# Supplementary material for: Graphene supported CoO nanoparticles as an advanced catalyst for aerobic oxidation of cyclohexane
Source: Royal Society of Chemistry journal article supplement (doi:10.1039/d1nj04944e), 2022-01-01
Supplement: d1nj04944e1.pdf [file d1nj04944e1.pdf]

## **The Graphene Supported CoO Nanoparticles as an Advanced Catalyst for Aerobic Oxidation of Cyclohexane**

Xinyu Han<sup>a</sup>, Yifan Liu<sup>b</sup>, Zhiyuan Qi<sup>a</sup>, Qilong Zhang<sup>a</sup>, Panfeng Zhao<sup>c</sup>, Lan Wang<sup>c</sup>, Lingfeng Gao<sup>a\*</sup>, Gengxiu Zheng<sup>a</sup>

a. School of Chemistry and Chemical Engineering, University of Jinan, No. 336 West Road of Nan Xinzhuang, Jinan 250022, P. R. China.

E-mail: [chm\\_gaolf@ujn.edu.cn](mailto:chm_gaolf@ujn.edu.cn)

b. Kyiv National University of Technologies and Design and Qilu University of Technology, No.3501,Daxue Road, Jinan 250353 Shandong Province, P. R. China

c. Shandong Huhai Pharmaceutical& Chemical CO., LTD, No. 678 Haining Road, Dongying 257200, Shandong Province, P. R. China

## S1. Characterization of MnO/G catalyst

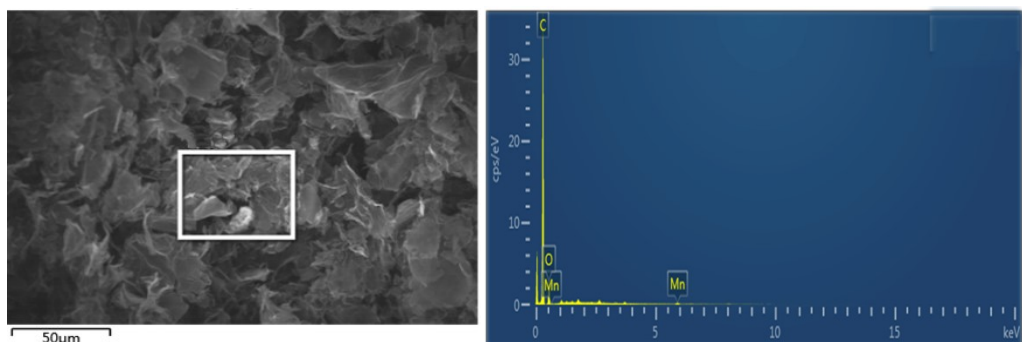

Fig. S1 SEM image and EDS pattern of the MnO@G catalyst.

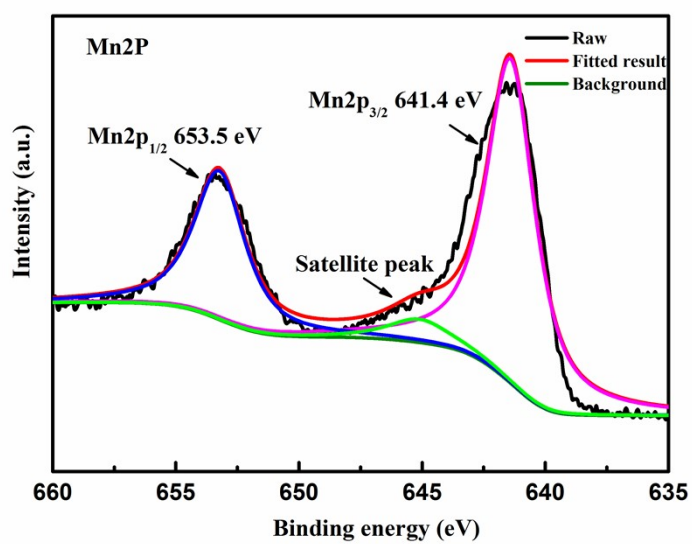

Fig. S2 Mn 2p spectrum of the synthesized MnO/G catalyst.

## S2. Characterization of Co<sub>3</sub>O<sub>4</sub>/G catalyst

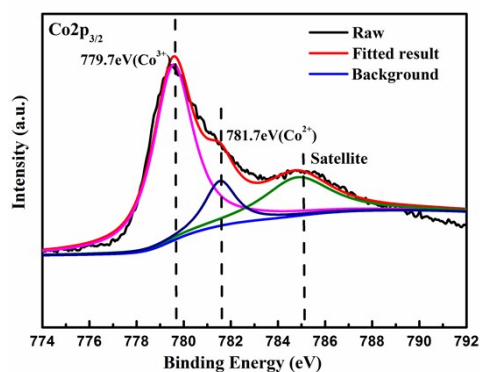

Fig. S3 Co 2p spectrum of the synthesized Co<sub>3</sub>O<sub>4</sub>/G catalyst.

## S3. The influence of reaction temperature, oxygen pressure, reaction time and catalyst amount

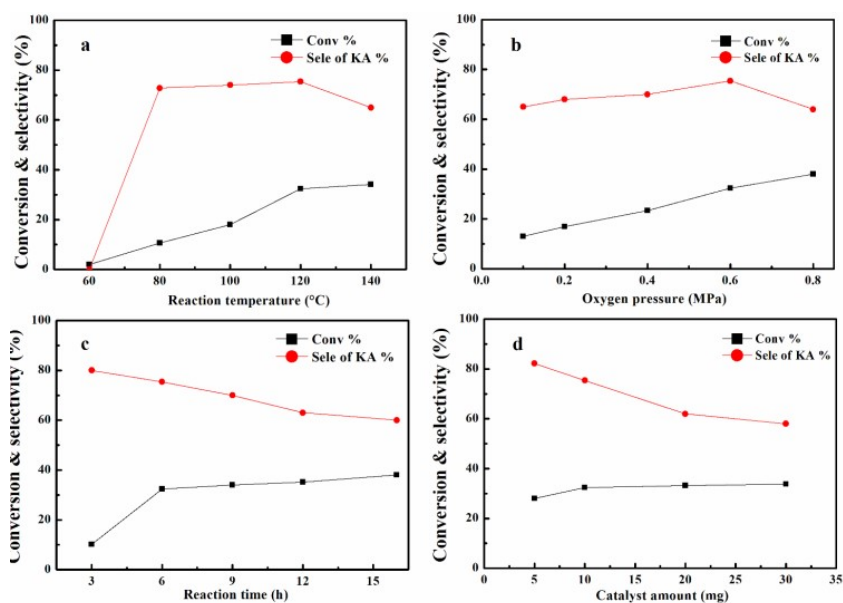

Fig. S4 Effect of reaction temperature (a), oxygen pressure (b), reaction time (c) and amount of catalyst (d) on cyclohexane oxidation over the CoO/G.

### S3. Calculation of conversion and selectivity

Conversion of cyclohexane and Selectivity of the products were calculated by the following formulas:

$$Con._{-ane}\% = \frac{n_{-ane(initial)} - n_{-ane(residual)}}{n_{-ane(initial)}} \times 100$$

$$Sele._{-nol/-none}\% = \frac{n_{-nol/-none}}{n_{-ane(initial)} - n_{-ane(residual)}} \times 100$$

where  $n_{-ane(initial)}$  and  $n_{-ane(residual)}$  denote the content of cyclohexane in the reaction solution before and after the reaction, respectively, and  $n_{-nol}$  and  $n_{-none}$  denote the contents of cyclohexanol and cyclohexanone in the reaction mixture, respectively.
